# Supplementary material
Source: publisher figshare collection journal article supplement (https://asha.figshare.com/articles/dataset/_/15032700)
Supplement: Supplementary file 2 [file 1]

## **Supplemental Material S1. Semistructured interview guide.**

Begin with a general discussion of AAC and visual scene displays based on the provided presentation sent out. Ensure the participant does not have any further questions.

*Question 1:* Previously, *complexity* in relation to AAC grid displays/ symbols has been defined as the number of elements that make up an individual symbol or the number of symbols in the array (e.g., number of strokes/lines required to produce a symbol, greater number of symbols in an array). From your perspective, what factors contribute to scene complexity and what makes a scene difficult to understand?

*Question 2:* In general, how do you think image complexity may impact the viewer?

*Question 3:* The visual cognitive science has discussed the importance of using faces/human figures and meaningful interactions in VSDs to support engagement and use. How can composition guidelines be used to emphasize these key scene elements, and decrease image complexity/distraction?

*Question 4:* Now I want to talk specifically about the use of color in scenes. How can the principles of composition maximize color to highlight focal points, and decrease image complexity/distraction?

*Question 5:* What camera settings could be used to emphasize these compositional elements quickly and automatically?
